# Supplementary material
Source: publisher site journal article supplement (https://www.spandidos-publications.com/8232/downloadSupplementary)

Figure S1. *TNF- $\alpha$*  promoter mutation (rs1799724) detected by sequencing.

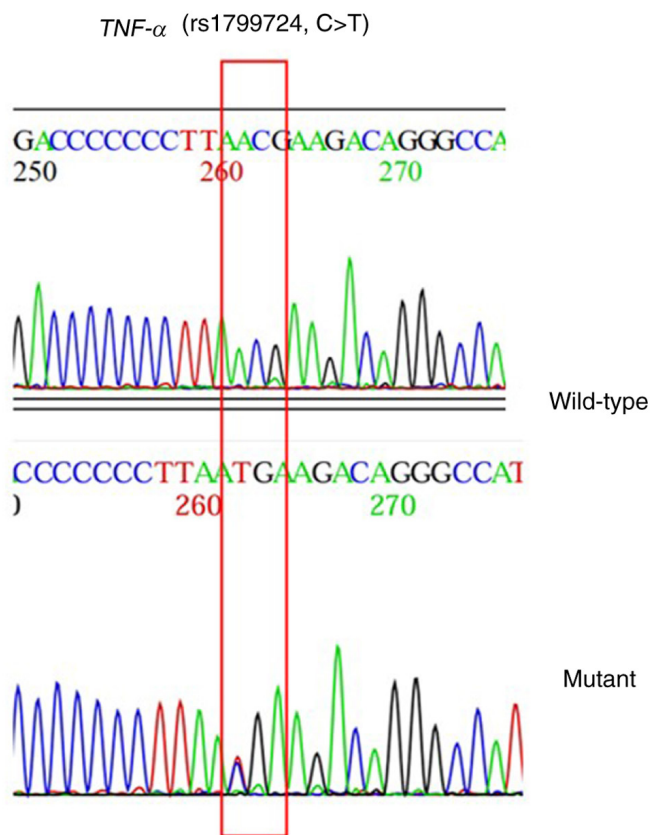

Figure S2. *TNF- $\alpha$*  promoter mutation (rs4248158) detected by sequencing.

*TNF- $\alpha$*  (rs4248158, C>T)

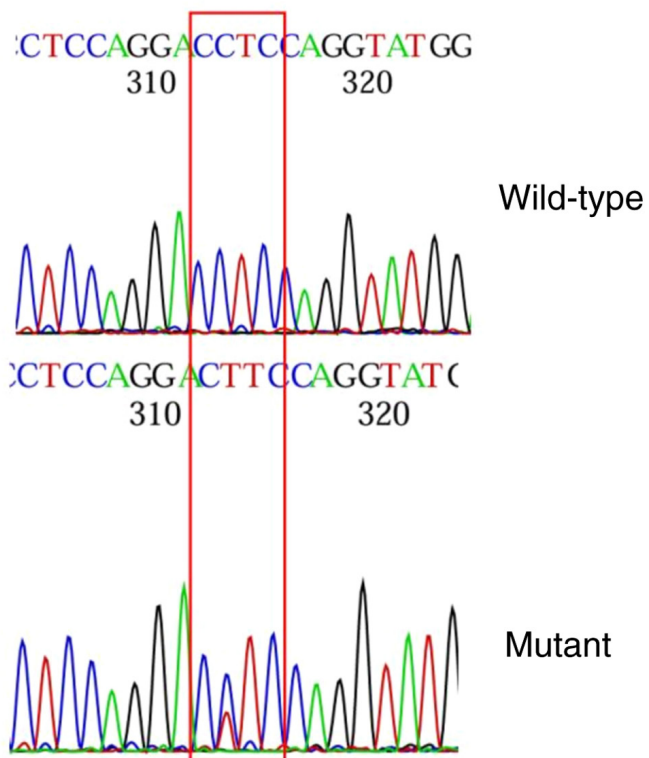

Figure S3. *TNF- $\alpha$*  promoter mutation (rs943806159 and rs1277698900) detected by sequencing.

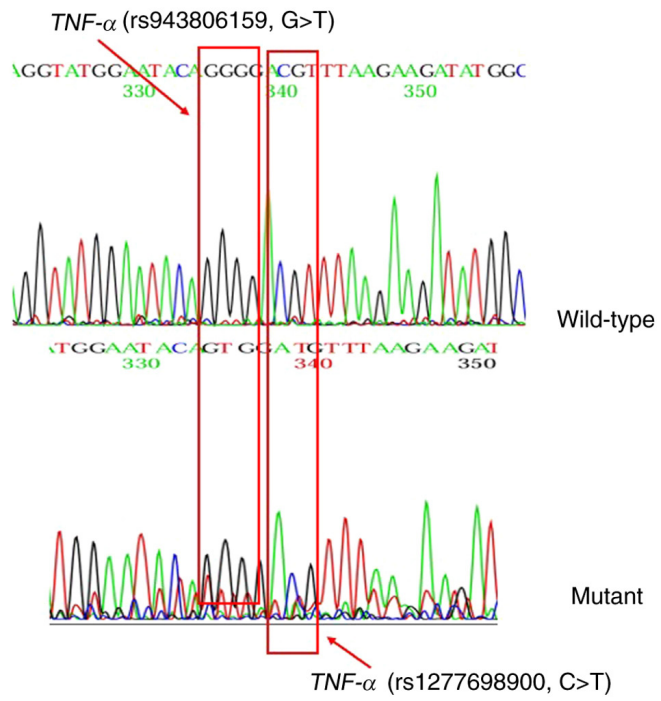

Figure S4. *TNF- $\alpha$*  promoter mutation (rs1771099055) detected by sequencing.

*TNF- $\alpha$*  (rs1771099055, CCCCC/CCCCC)

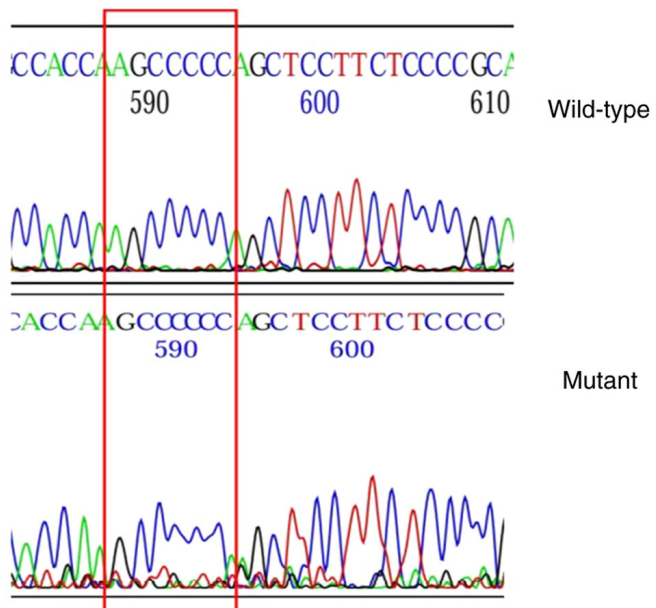

Figure S5. *TNF- $\alpha$*  promoter mutation (rs1466575171) detected by sequencing.

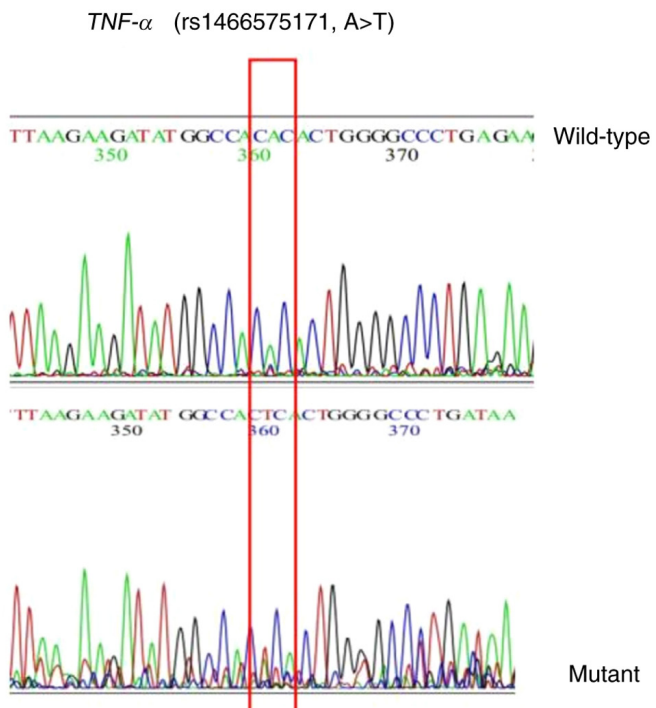

Figure S6. *TNF- $\alpha$*  promoter mutation (rs2533238182) detected by sequencing.

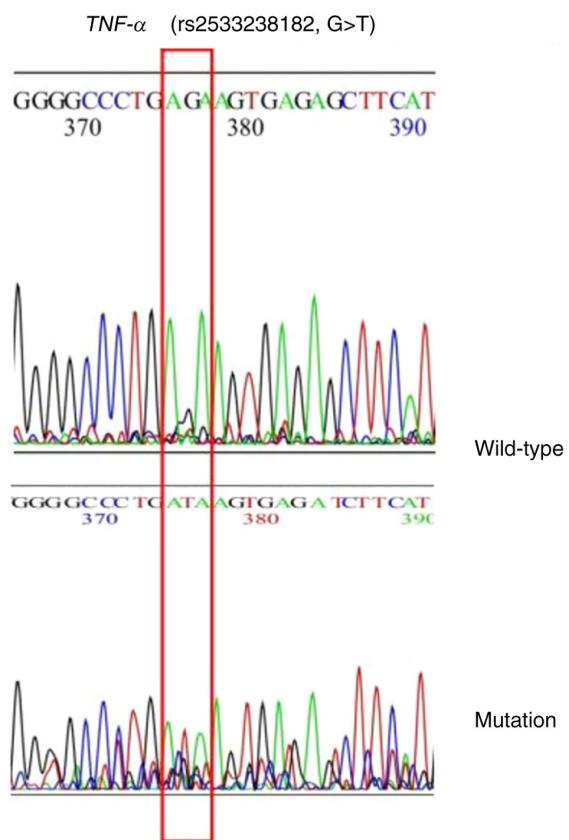

Figure S7. *TNF- $\alpha$*  promoter mutation (rs899519990) detected by sequencing.

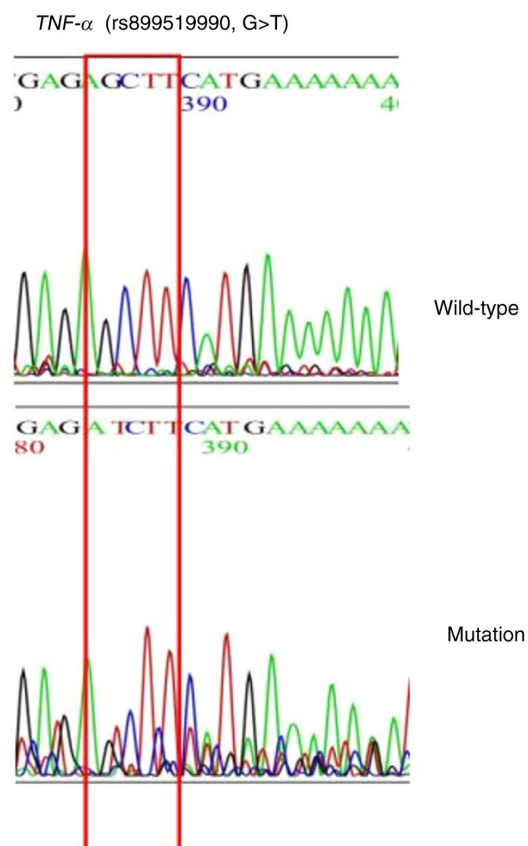

Figure S8. *TNF- $\alpha$*  promoter mutation (rs1799964) detected by sequencing.

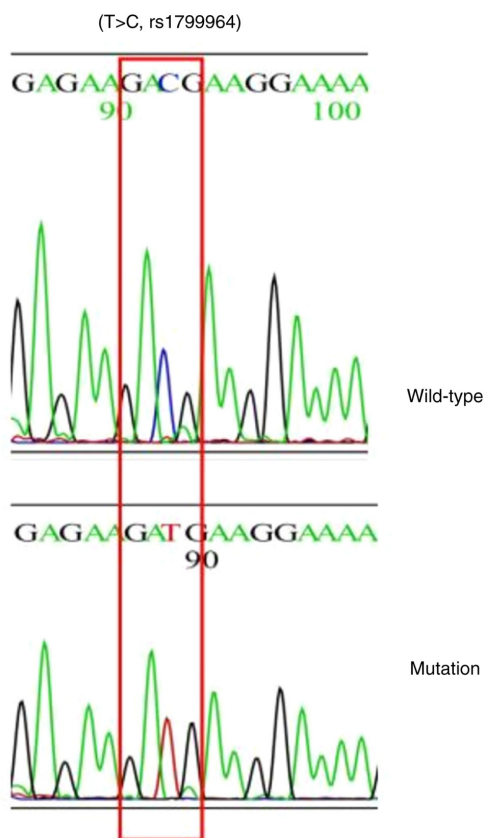

Figure S9. *TNF- $\alpha$*  promoter mutation (rs1800629) detected by sequencing.

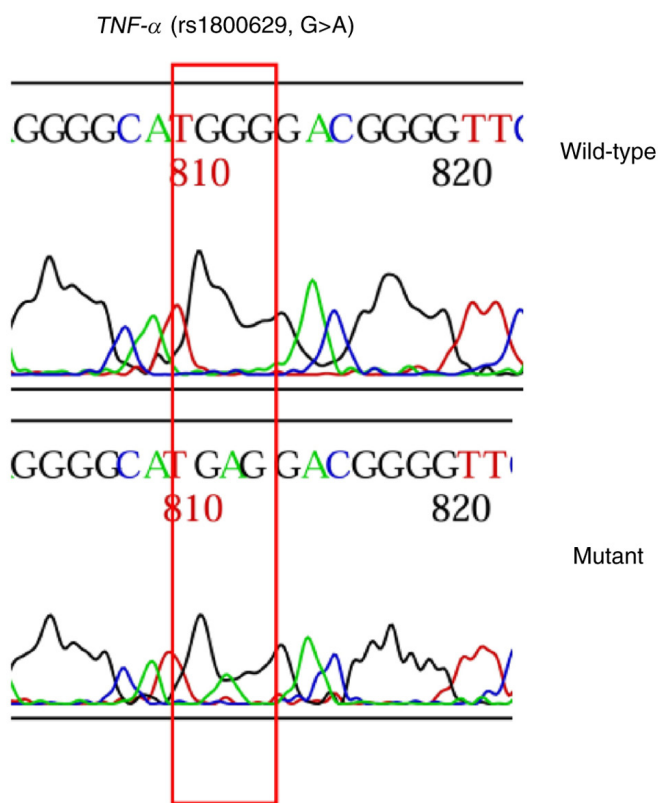

Figure S10. *TNF- $\alpha$*  promoter mutation (rs924800313) detected by sequencing.

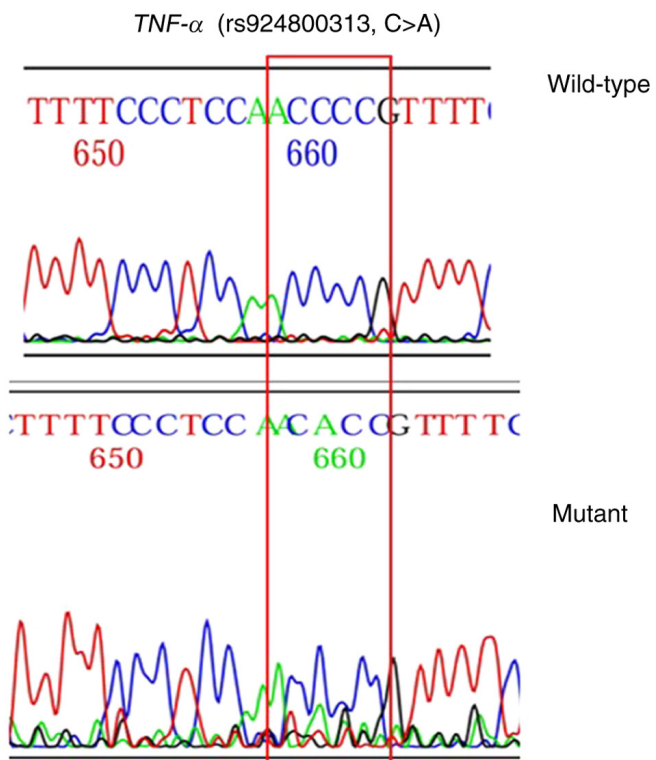

Figure S11. *TNF- $\alpha$*  promoter mutation (rs1452146766) detected by sequencing.

*TNF- $\alpha$*  (rs1452146766, TTTT>TTTTT)

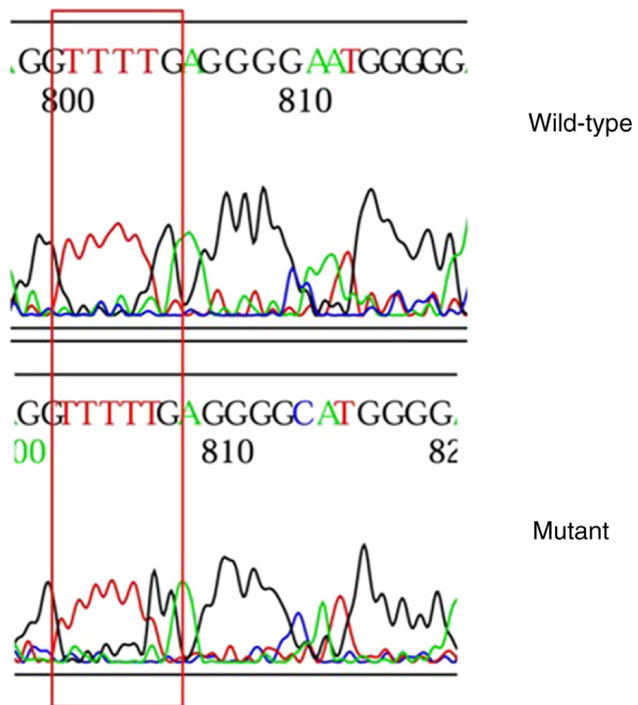

Figure S12. *TNF- $\alpha$*  promoter mutation (rs1554283139) detected by sequencing.

*TNF- $\alpha$*  (rs1554283139, CCCCCC>CCCCAC)

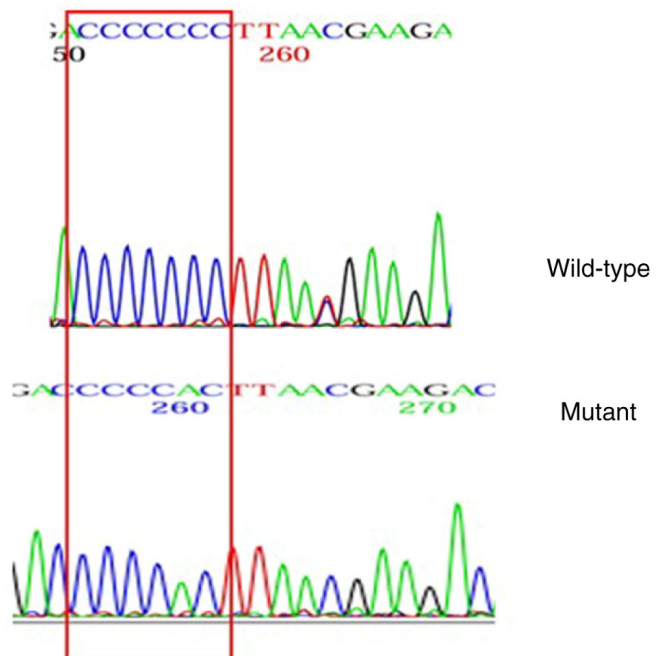

Figure S13. PCR detection of *TNF- $\alpha$*  promoter (size, 1,102 bp).

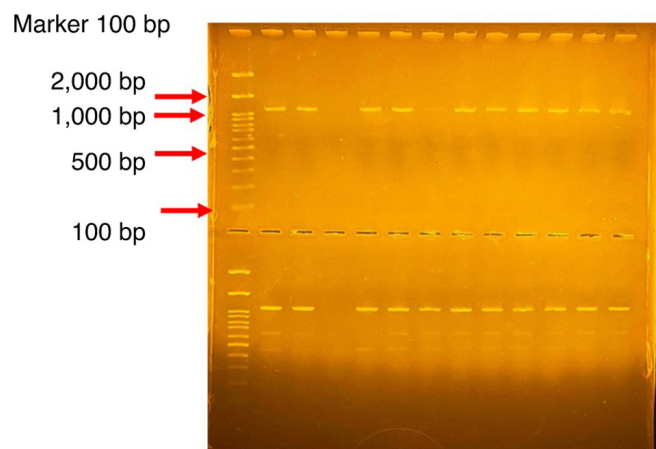

Figure S14. Example of *TNF- $\alpha$*  promoter (-1031; CC and TC) detected by PCR.

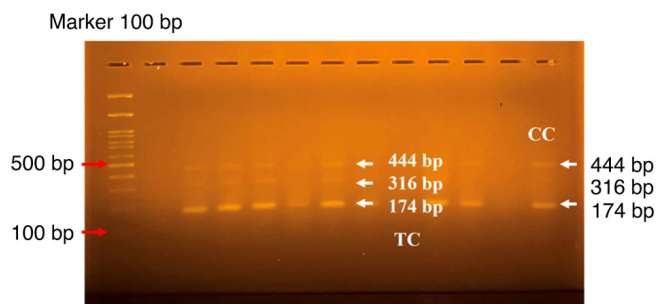

Figure S15. Example of *TNF- $\alpha$*  promoter (-1031; TT) detected by PCR.

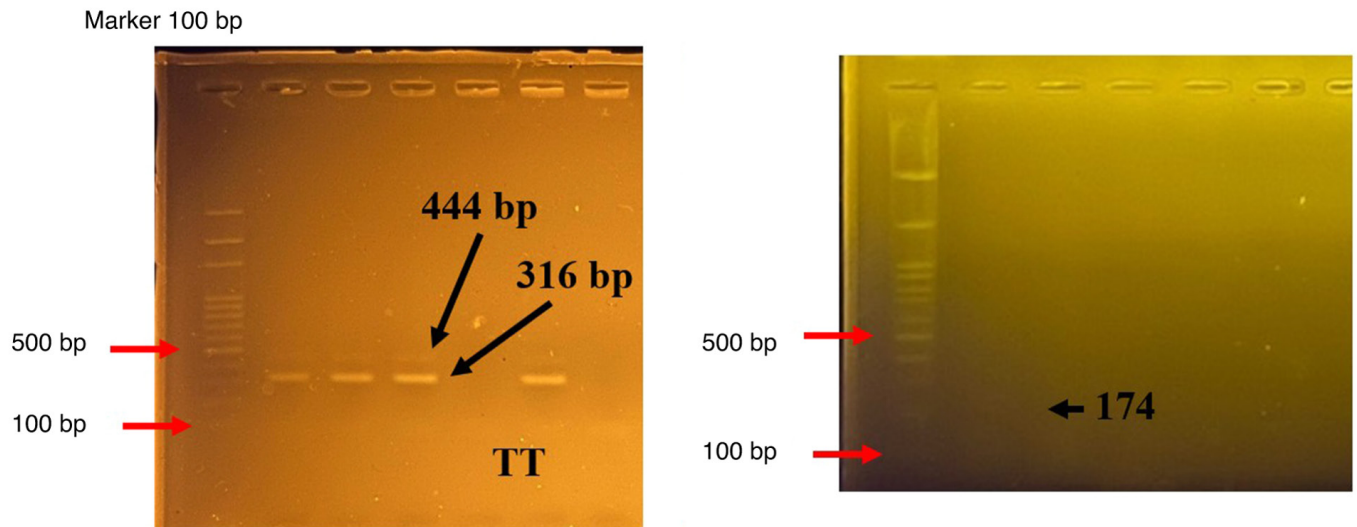

Supplement: Supplementary file [file downloadSupplementary]
